# Supplementary material
Source: PubMed Central journal article supplement (PMC2254184)
Supplement: NIHMS40273-supplement-Sup_Figure_1.pdf [file NIHMS40273-supplement-Sup_Figure_1.pdf]

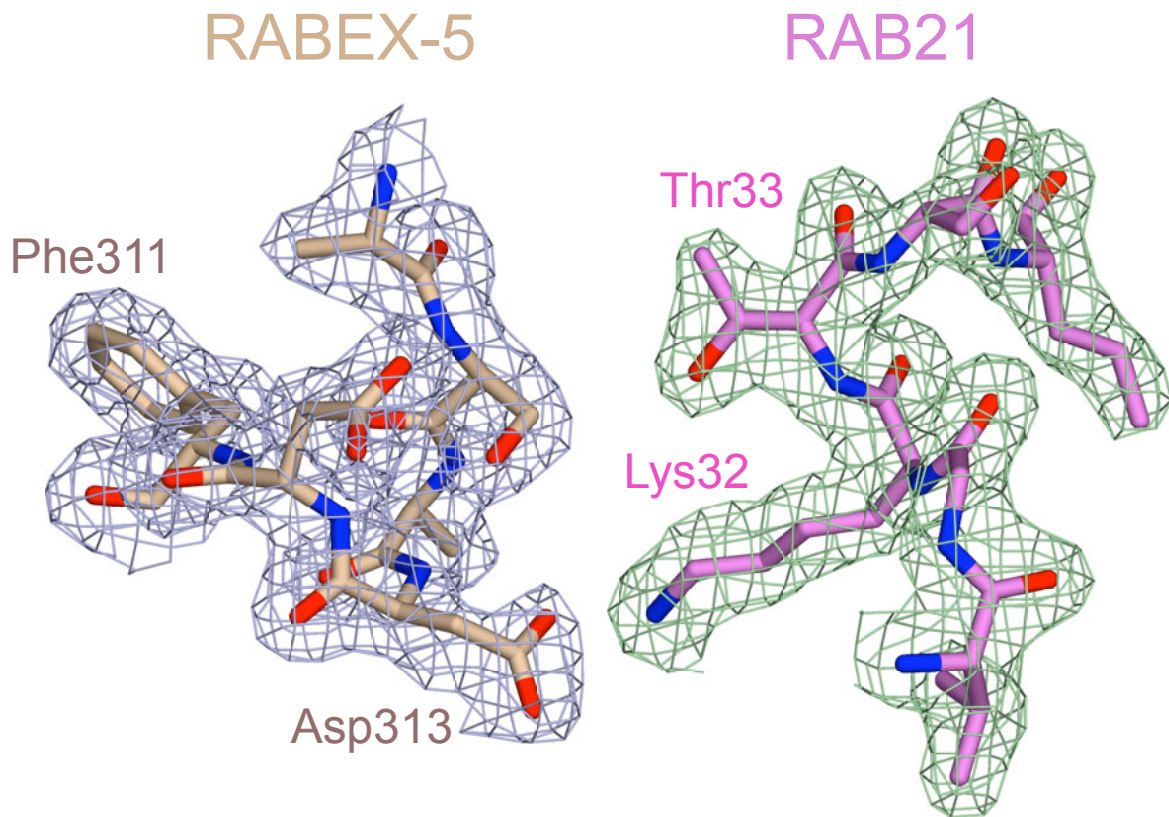

**Supplementary Figure 1.** Electron density from a  $\sigma$ A-weighted  $2F_o - F_c$  map following simulated annealing at 3000°K with the regions shown omitted. The map was contoured at 1.0  $\sigma$  and displayed with the final refined model.
